# Supplementary material
Source: HighWire-hosted journal article supplement (https://bmjopen.bmj.com/content/10/5/e035245)

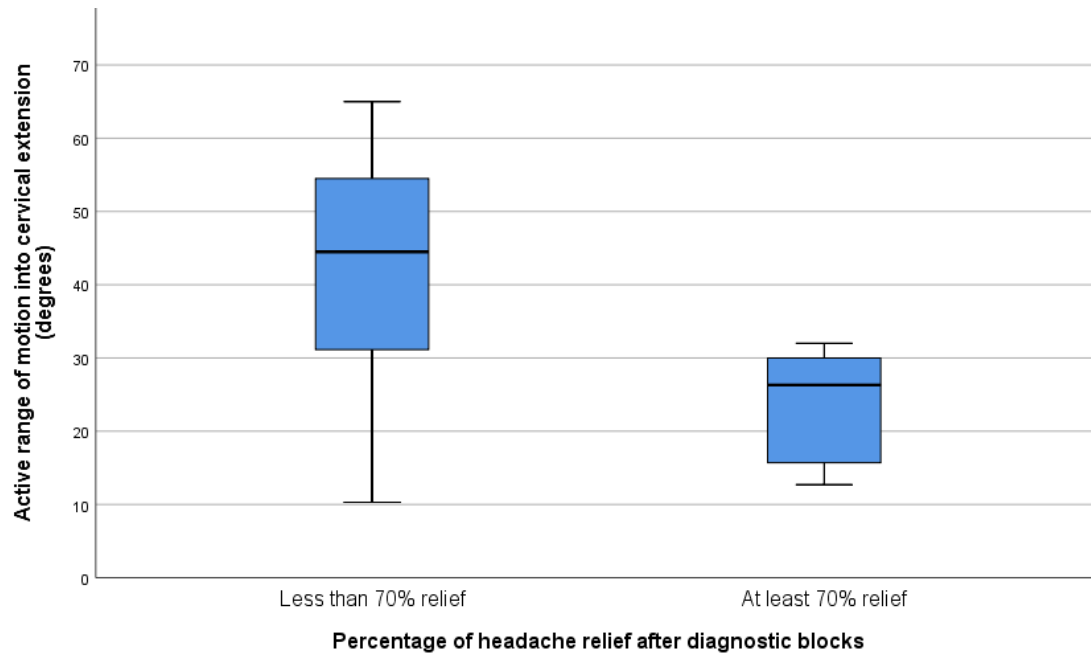

Supplement: inline-supplementary-material-2 [file inline-supplementary-material-2.pdf]



Supplement: inline-supplementary-material-4 [file inline-supplementary-material-4.pdf]



Supplement: inline-supplementary-material-5 [file inline-supplementary-material-5.pdf]
